# Supplementary material for: Green Tea and Coffee Consumption and All-Cause Mortality Among Persons With and Without Stroke or Myocardial Infarction
Source: PubMed Central journal article supplement — Stroke. 2021 Feb 4;52(3):957–65. doi: 10.1161/STROKEAHA.120.032273 (PMC7903984; doi:10.1161/strokeaha.120.032273), 2021-02-04
Supplement: str-52-957-s001.pdf [file str-52-957-s001.pdf]

## **SUPPLEMENTAL MATERIAL**

**Supplemental Table I. Sex-specific hazard ratios (95% confidence intervals) of all-cause mortality according to green tea consumption**

|                                        | Green tea consumption |                  |                  |                  |                  |                  | P for trend |
|----------------------------------------|-----------------------|------------------|------------------|------------------|------------------|------------------|-------------|
|                                        | None                  | 1-6 Cups/Week    | 1-2 Cups/d       | 3-4 Cups/d       | 5-6 Cups/d       | ≥7 Cups/d        |             |
| <b>Men</b>                             |                       |                  |                  |                  |                  |                  |             |
| <b>History of stroke</b>               |                       |                  |                  |                  |                  |                  |             |
| Person-years                           | 248                   | 527              | 491              | 992              | 858              | 420              |             |
| No. of cases                           | 18                    | 30               | 20               | 44               | 30               | 16               |             |
| Mortality rate (per 1000 person-years) | 72.6                  | 56.9             | 40.7             | 44.4             | 35.0             | 38.1             |             |
| Age-adjusted HR (95%CI)                | Ref                   | 0.98 (0.54-1.77) | 0.58 (0.31-1.11) | 0.58 (0.34-1.01) | 0.40 (0.22-0.73) | 0.47 (0.24-0.92) | <0.001      |
| Multivariable HR (95%CI)               | Ref                   | 1.26 (0.56-2.80) | 0.72 (0.32-1.62) | 0.67 (0.33-1.38) | 0.62 (0.29-1.34) | 0.52 (0.22-1.22) | 0.02        |
| <b>History of MI</b>                   |                       |                  |                  |                  |                  |                  |             |
| Person-years                           | 489                   | 798              | 859              | 1677             | 1189             | 873              |             |
| No. of cases                           | 29                    | 32               | 26               | 54               | 42               | 26               |             |
| Mortality rate (per 1000 person-years) | 59.3                  | 40.1             | 30.3             | 32.2             | 35.3             | 29.8             |             |
| Age-adjusted HR (95%CI)                | Ref                   | 0.62 (0.37-1.02) | 0.45 (0.26-0.76) | 0.50 (0.32-0.79) | 0.59 (0.37-0.96) | 0.36 (0.21-0.62) | 0.02        |
| Multivariable HR (95%CI)               | Ref                   | 0.57 (0.31-1.03) | 0.36 (0.19-0.66) | 0.47 (0.28-0.80) | 0.48 (0.27-0.84) | 0.26 (0.14-0.48) | 0.002       |
| <b>No history of stroke or MI</b>      |                       |                  |                  |                  |                  |                  |             |
| Person-years                           | 25664                 | 39231            | 37058            | 61478            | 68816            | 43766            |             |
| No. of cases                           | 515                   | 671              | 579              | 1073             | 1238             | 862              |             |
| Mortality rate (per 1000 person-years) | 20.1                  | 17.1             | 15.6             | 17.5             | 18.0             | 19.7             |             |
| Age-adjusted HR (95%CI)                | Ref                   | 0.92 (0.82-1.03) | 0.90 (0.80-1.02) | 0.91 (0.82-1.01) | 0.90 (0.81-1.00) | 0.90 (0.80-1.00) | 0.15        |
| Multivariable HR (95%CI)               | Ref                   | 0.96 (0.85-1.08) | 0.98 (0.86-1.10) | 0.99 (0.88-1.10) | 0.96 (0.86-1.07) | 0.93 (0.83-1.04) | 0.28        |
| <b>Women</b>                           |                       |                  |                  |                  |                  |                  |             |
| <b>History of stroke</b>               |                       |                  |                  |                  |                  |                  |             |
| Person-years                           | 330                   | 225              | 193              | 684              | 547              | 332              |             |

|                                                                                                                                                                                                                                                                                                                               |       |                  |                  |                  |                  |                  |       |
|-------------------------------------------------------------------------------------------------------------------------------------------------------------------------------------------------------------------------------------------------------------------------------------------------------------------------------|-------|------------------|------------------|------------------|------------------|------------------|-------|
| No. of cases                                                                                                                                                                                                                                                                                                                  | 16    | 11               | 9                | 16               | 17               | 5                |       |
| Mortality rate (per 1000 person-years)                                                                                                                                                                                                                                                                                        | 48.5  | 48.9             | 46.6             | 23.4             | 31.1             | 15.1             |       |
| Age-adjusted HR (95%CI)                                                                                                                                                                                                                                                                                                       | Ref   | 0.47 (0.21-1.05) | 0.76 (0.33-1.74) | 0.41 (0.20-0.82) | 0.45 (0.22-0.90) | 0.18 (0.07-0.51) | 0.002 |
| Multivariable HR (95%CI)                                                                                                                                                                                                                                                                                                      | Ref   | 0.36 (0.11-1.20) | 1.48 (0.34-6.47) | 0.44 (0.15-1.29) | 0.52 (0.16-1.63) | 0.14 (0.03-0.69) | 0.08  |
| <b>History of MI</b>                                                                                                                                                                                                                                                                                                          |       |                  |                  |                  |                  |                  |       |
| Person-years                                                                                                                                                                                                                                                                                                                  | 1332  | 1429             | 1053             | 2076             | 2124             | 882              |       |
| No. of cases                                                                                                                                                                                                                                                                                                                  | 30    | 17               | 17               | 39               | 29               | 14               |       |
| Mortality rate (per 1000 person-years)                                                                                                                                                                                                                                                                                        | 22.5  | 11.9             | 16.1             | 18.8             | 13.7             | 15.9             |       |
| Age-adjusted HR (95%CI)                                                                                                                                                                                                                                                                                                       | Ref   | 0.58 (0.32-1.05) | 0.79 (0.44-1.44) | 0.91 (0.56-1.47) | 0.68 (0.41-1.13) | 0.70 (0.37-1.33) | 0.50  |
| Multivariable HR (95%CI)                                                                                                                                                                                                                                                                                                      | Ref   | 0.72 (0.37-1.39) | 1.07 (0.56-2.07) | 1.35 (0.78-2.34) | 1.05 (0.58-1.91) | 0.81 (0.39-1.68) | 0.87  |
| <b>No history of stroke or MI</b>                                                                                                                                                                                                                                                                                             |       |                  |                  |                  |                  |                  |       |
| Person-years                                                                                                                                                                                                                                                                                                                  | 47892 | 62999            | 50699            | 105306           | 108221           | 56158            |       |
| No. of cases                                                                                                                                                                                                                                                                                                                  | 508   | 551              | 375              | 913              | 895              | 486              |       |
| Mortality rate (per 1000 person-years)                                                                                                                                                                                                                                                                                        | 10.6  | 8.7              | 7.4              | 8.7              | 8.3              | 8.7              |       |
| Age-adjusted HR (95%CI)                                                                                                                                                                                                                                                                                                       | Ref   | 0.93 (0.82-1.04) | 0.87 (0.76-0.99) | 0.87 (0.78-0.97) | 0.84 (0.75-0.93) | 0.85 (0.75-0.96) | 0.003 |
| Multivariable HR (95%CI)                                                                                                                                                                                                                                                                                                      | Ref   | 0.97 (0.86-1.10) | 0.95 (0.83-1.09) | 0.96 (0.85-1.07) | 0.91 (0.81-1.02) | 0.91 (0.80-1.04) | 0.08  |
| HR, hazard ratio; CI, confidence interval.                                                                                                                                                                                                                                                                                    |       |                  |                  |                  |                  |                  |       |
| Multivariable HR: adjusted for age, coffee consumption, history of hypertension, history of diabetes, body mass index, smoking status, alcohol consumption, hours of exercise, hours of walking, perceived mental stress, educational level, regular employment, and dietary intakes of vegetable, fish, fruits and soybeans. |       |                  |                  |                  |                  |                  |       |

**Supplemental Table II. Hazard ratios (95% confidence intervals) of CVD and cancer mortality according to green tea consumption**

|                                        | Green tea consumption |                  |                   |                  |                  |                  | P for trend |
|----------------------------------------|-----------------------|------------------|-------------------|------------------|------------------|------------------|-------------|
|                                        | None                  | 1-6 Cups/Week    | 1-2 Cups/d        | 3-4 Cups/d       | 5-6 Cups/d       | ≥7 Cups/d        |             |
| <b>History of stroke</b>               |                       |                  |                   |                  |                  |                  |             |
| Person-years                           | 578                   | 752              | 685               | 1676             | 1405             | 752              |             |
| CVD mortality                          |                       |                  |                   |                  |                  |                  |             |
| No. of cases                           | 16                    | 19               | 12                | 28               | 23               | 9                |             |
| Mortality rate (per 1000 person-years) | 27.7                  | 25.3             | 17.5              | 16.7             | 16.4             | 12.0             |             |
| Age- and sex-adjusted HR (95%CI)       | Ref                   | 0.87 (0.45-1.69) | 0.57 (0.27-1.22)  | 0.55 (0.29-1.01) | 0.48 (0.25-0.92) | 0.36 (0.16-0.82) | 0.004       |
| Multivariable HR (95%CI)               | Ref                   | 0.63 (0.28-1.43) | 0.52 (0.21-1.25)  | 0.54 (0.26-1.13) | 0.47 (0.22-0.99) | 0.27 (0.10-0.70) | 0.016       |
| Cancer mortality                       |                       |                  |                   |                  |                  |                  |             |
| No. of cases                           | 2                     | 5                | 8                 | 8                | 9                | 4                |             |
| Mortality rate (per 1000 person-years) | 3.5                   | 6.6              | 11.7              | 4.8              | 6.4              | 5.3              |             |
| Age- and sex-adjusted HR (95%CI)       | Ref                   | 1.70 (0.33-8.81) | 3.06 (0.65-14.52) | 1.23 (0.26-5.82) | 1.55 (0.33-7.20) | 1.28 (0.23-7.00) | 0.55        |
| Multivariable HR (95%CI)               | Ref                   | 1.09 (0.15-7.72) | 2.50 (0.39-15.89) | 0.75 (0.12-4.61) | 1.24 (0.20-7.70) | 1.00 (0.13-7.89) | 0.60        |
| <b>History of MI</b>                   |                       |                  |                   |                  |                  |                  |             |
| Person-years                           | 1820                  | 2227             | 1912              | 3753             | 3313             | 1755             |             |
| CVD mortality                          |                       |                  |                   |                  |                  |                  |             |
| No. of cases                           | 29                    | 21               | 14                | 42               | 30               | 15               |             |
| Mortality rate (per 1000 person-years) | 15.9                  | 9.4              | 7.3               | 11.2             | 9.1              | 8.5              |             |
| Age- and sex-adjusted HR (95%CI)       | Ref                   | 0.57 (0.32-1.00) | 0.38 (0.20-0.73)  | 0.61 (0.38-0.99) | 0.57 (0.34-0.95) | 0.36 (0.19-0.68) | 0.05        |
| Multivariable HR (95%CI)               | Ref                   | 0.71 (0.38-1.32) | 0.39 (0.19-0.77)  | 0.77 (0.45-1.31) | 0.61 (0.34-1.07) | 0.36 (0.18-0.72) | 0.05        |
| Cancer mortality                       |                       |                  |                   |                  |                  |                  |             |
| No. of cases                           | 15                    | 8                | 16                | 22               | 16               | 9                |             |
| Mortality rate (per 1000 person-years) | 8.2                   | 3.6              | 8.4               | 5.9              | 4.8              | 5.1              |             |
| Age- and sex-adjusted HR (95%CI)       | Ref                   | 0.40 (0.17-0.94) | 0.86 (0.42-1.76)  | 0.61 (0.32-1.19) | 0.56 (0.27-1.13) | 0.46 (0.20-1.07) | 0.19        |
| Multivariable HR (95%CI)               | Ref                   | 0.29 (0.11-0.74) | 1.02 (0.45-2.27)  | 0.67 (0.31-1.45) | 0.61 (0.28-1.34) | 0.33 (0.13-0.87) | 0.16        |

| <b>No history of stroke or MI</b>                                                                                                                                                                                                                                                                                                  |       |                  |                  |                  |                  |                  |        |
|------------------------------------------------------------------------------------------------------------------------------------------------------------------------------------------------------------------------------------------------------------------------------------------------------------------------------------|-------|------------------|------------------|------------------|------------------|------------------|--------|
| Person-years                                                                                                                                                                                                                                                                                                                       | 73555 | 102230           | 87758            | 166783           | 177037           | 99923            |        |
| <b>CVD mortality</b>                                                                                                                                                                                                                                                                                                               |       |                  |                  |                  |                  |                  |        |
| No. of cases                                                                                                                                                                                                                                                                                                                       | 306   | 356              | 237              | 583              | 582              | 353              |        |
| Mortality rate (per 1000 person-years)                                                                                                                                                                                                                                                                                             | 4.2   | 3.5              | 2.7              | 3.5              | 3.3              | 3.5              |        |
| Age- and sex-adjusted HR (95%CI)                                                                                                                                                                                                                                                                                                   | Ref   | 0.92 (0.79-1.07) | 0.77 (0.65-0.91) | 0.89 (0.78-1.03) | 0.82 (0.72-0.95) | 0.80 (0.68-0.93) | 0.0096 |
| Multivariable HR (95%CI)                                                                                                                                                                                                                                                                                                           | Ref   | 0.99 (0.84-1.15) | 0.85 (0.71-1.01) | 0.99 (0.86-1.15) | 0.91 (0.79-1.05) | 0.87 (0.74-1.02) | 0.14   |
| <b>Cancer mortality</b>                                                                                                                                                                                                                                                                                                            |       |                  |                  |                  |                  |                  |        |
| No. of cases                                                                                                                                                                                                                                                                                                                       | 335   | 423              | 379              | 710              | 811              | 546              |        |
| Mortality rate (per 1000 person-years)                                                                                                                                                                                                                                                                                             | 4.6   | 4.1              | 4.3              | 4.3              | 4.6              | 5.5              |        |
| Age- and sex-adjusted HR (95%CI)                                                                                                                                                                                                                                                                                                   | Ref   | 0.94 (0.82-1.09) | 1.01 (0.87-1.17) | 0.95 (0.83-1.08) | 0.97 (0.86-1.11) | 1.05 (0.91-1.20) | 0.41   |
| Multivariable HR (95%CI)                                                                                                                                                                                                                                                                                                           | Ref   | 0.96 (0.83-1.11) | 1.02 (0.87-1.18) | 0.96 (0.84-1.10) | 0.97 (0.85-1.11) | 1.00 (0.88-1.16) | 0.95   |
| HR, hazard ratio; CI, confidence interval.                                                                                                                                                                                                                                                                                         |       |                  |                  |                  |                  |                  |        |
| Multivariable HR: adjusted for age, sex, coffee consumption, history of hypertension, history of diabetes, body mass index, smoking status, alcohol consumption, hours of exercise, hours of walking, perceived mental stress, educational level, regular employment, and dietary intakes of vegetable, fish, fruits and soybeans. |       |                  |                  |                  |                  |                  |        |

**Supplemental Table III. Sensitivity analyses of all-cause mortality according to green tea consumption, excluding all participants who died during the first five years of follow-up**

|                                        | Green tea consumption |                  |                  |                  |                  |                  | P for trend |
|----------------------------------------|-----------------------|------------------|------------------|------------------|------------------|------------------|-------------|
|                                        | None                  | 1-6 Cups/Week    | 1-2 Cups/d       | 3-4 Cups/d       | 5-6 Cups/d       | ≥7 Cups/d        |             |
| <b>History of stroke</b>               |                       |                  |                  |                  |                  |                  |             |
| Person-years                           | 557                   | 735              | 656              | 1638             | 1376             | 743              |             |
| No. of cases                           | 25                    | 33               | 20               | 44               | 35               | 18               |             |
| Mortality rate (per 1000 person-years) | 44.9                  | 44.9             | 30.5             | 26.9             | 25.4             | 24.2             |             |
| Age- and sex-adjusted HR (95%CI)       | Ref                   | 0.86 (0.51-1.45) | 0.60 (0.33-1.08) | 0.49 (0.30-0.81) | 0.39 (0.23-0.66) | 0.36 (0.19-0.66) | <0.001      |
| Multivariable HR (95%CI)               | Ref                   | 0.88 (0.46-1.70) | 0.69 (0.34-1.42) | 0.55 (0.30-1.02) | 0.51 (0.28-0.95) | 0.35 (0.17-0.73) | 0.001       |
| <b>History of MI</b>                   |                       |                  |                  |                  |                  |                  |             |
| Person-years                           | 1783                  | 2186             | 1890             | 3668             | 3266             | 1744             |             |
| No. of cases                           | 45                    | 35               | 35               | 62               | 55               | 37               |             |
| Mortality rate (per 1000 person-years) | 25.2                  | 16.0             | 18.5             | 16.9             | 16.8             | 21.2             |             |
| Age- and sex-adjusted HR (95%CI)       | Ref                   | 0.56 (0.36-0.88) | 0.60 (0.38-0.93) | 0.60 (0.41-0.89) | 0.63 (0.42-0.93) | 0.54 (0.35-0.85) | 0.13        |
| Multivariable HR (95%CI)               | Ref                   | 0.64 (0.39-1.03) | 0.68 (0.42-1.11) | 0.74 (0.48-1.13) | 0.73 (0.47-1.13) | 0.53 (0.32-0.87) | 0.12        |
| <b>No history of stroke or MI</b>      |                       |                  |                  |                  |                  |                  |             |
| Person-years                           | 73138                 | 101765           | 87296            | 165794           | 176130           | 99420            |             |
| No. of cases                           | 874                   | 1060             | 797              | 1659             | 1809             | 1171             |             |
| Mortality rate (per 1000 person-years) | 12.0                  | 10.4             | 9.1              | 10.0             | 10.3             | 11.8             |             |
| Age- and sex-adjusted HR (95%CI)       | Ref                   | 0.92 (0.84-1.01) | 0.88 (0.80-0.97) | 0.88 (0.81-0.96) | 0.86 (0.79-0.93) | 0.87 (0.80-0.95) | 0.002       |
| Multivariable HR (95%CI)               | Ref                   | 0.95 (0.87-1.05) | 0.95 (0.86-1.05) | 0.96 (0.88-1.04) | 0.92 (0.85-1.00) | 0.92 (0.84-1.00) | 0.05        |

HR, hazard ratio; CI, confidence interval.

Multivariable HR: adjusted for age, sex, coffee consumption, history of hypertension, history of diabetes, body mass index, smoking status, alcohol consumption, hours of exercise, hours of walking, perceived mental stress, educational level, regular employment, and dietary intakes of vegetable, fish, fruits and soybeans.

**Supplemental Table IV. Sex-specific hazard ratios (95% confidence intervals) of all-cause mortality according to coffee consumption**

|                                        | Coffee consumption |                  |                  |                  | P for trend |
|----------------------------------------|--------------------|------------------|------------------|------------------|-------------|
|                                        | None               | 1-6 Cups/Week    | 1 Cup/d          | ≥2 Cups/d        |             |
| <b>Men</b>                             |                    |                  |                  |                  |             |
| <b>History of stroke</b>               |                    |                  |                  |                  |             |
| Person-years                           | 1447               | 1384             | 372              | 335              |             |
| No. of cases                           | 71                 | 57               | 13               | 17               |             |
| Mortality rate (per 1000 person-years) | 49.1               | 41.2             | 34.9             | 50.7             |             |
| Age-adjusted HR (95%CI)                | Ref                | 0.97 (0.69-1.38) | 0.83 (0.46-1.50) | 1.48 (0.87-2.53) | 0.29        |
| Multivariable HR (95%CI)               | Ref                | 1.18 (0.77-1.80) | 0.95 (0.46-1.93) | 1.61 (0.82-3.17) | 0.26        |
| <b>History of MI</b>                   |                    |                  |                  |                  |             |
| Person-years                           | 1691               | 2103             | 836              | 1255             |             |
| No. of cases                           | 90                 | 59               | 27               | 33               |             |
| Mortality rate (per 1000 person-years) | 53.2               | 28.1             | 32.3             | 26.3             |             |
| Age-adjusted HR (95%CI)                | Ref                | 0.62 (0.44-0.86) | 0.77 (0.50-1.18) | 0.65 (0.44-0.98) | 0.12        |
| Multivariable HR (95%CI)               | Ref                | 0.51 (0.35-0.74) | 0.73 (0.45-1.19) | 0.58 (0.37-0.93) | 0.13        |
| <b>No history of stroke or MI</b>      |                    |                  |                  |                  |             |
| Person-years                           | 79655              | 99884            | 35481            | 60991            |             |
| No. of cases                           | 1913               | 1700             | 608              | 717              |             |
| Mortality rate (per 1000 person-years) | 24.0               | 17.0             | 17.1             | 11.8             |             |
| Age-adjusted HR (95%CI)                | Ref                | 0.84 (0.78-0.89) | 0.93 (0.85-1.02) | 0.88 (0.80-0.96) | <0.001      |
| Multivariable HR (95%CI)               | Ref                | 0.87 (0.81-0.93) | 0.96 (0.87-1.05) | 0.84 (0.76-0.92) | 0.003       |
| <b>Women</b>                           |                    |                  |                  |                  |             |
| <b>History of stroke</b>               |                    |                  |                  |                  |             |
| Person-years                           | 1256               | 688              | 163              | 203              |             |

|                                                                                                                                                                                                                                                                                                                                  |        |                  |                  |                  |        |
|----------------------------------------------------------------------------------------------------------------------------------------------------------------------------------------------------------------------------------------------------------------------------------------------------------------------------------|--------|------------------|------------------|------------------|--------|
| No. of cases                                                                                                                                                                                                                                                                                                                     | 45     | 25               | 1                | 3                |        |
| Mortality rate (per 1000 person-years)                                                                                                                                                                                                                                                                                           | 35.8   | 36.3             | 6.1              | 14.8             |        |
| Age-adjusted HR (95%CI)                                                                                                                                                                                                                                                                                                          | Ref    | 1.10 (0.67-1.80) | 0.26 (0.04-1.89) | 0.58 (0.18-1.89) | 0.22   |
| Multivariable HR (95%CI)                                                                                                                                                                                                                                                                                                         | Ref    | 1.54 (0.72-3.29) | 0.27 (0.02-3.14) | 2.02 (0.42-9.63) | 0.58   |
| <b>History of MI</b>                                                                                                                                                                                                                                                                                                             |        |                  |                  |                  |        |
| Person-years                                                                                                                                                                                                                                                                                                                     | 3401   | 2761             | 1562             | 1172             |        |
| No. of cases                                                                                                                                                                                                                                                                                                                     | 73     | 45               | 22               | 6                |        |
| Mortality rate (per 1000 person-years)                                                                                                                                                                                                                                                                                           | 21.5   | 16.3             | 14.1             | 5.1              |        |
| Age-adjusted HR (95%CI)                                                                                                                                                                                                                                                                                                          | Ref    | 0.91 (0.63-1.33) | 0.90 (0.55-1.46) | 0.52 (0.22-1.20) | 0.15   |
| Multivariable HR (95%CI)                                                                                                                                                                                                                                                                                                         | Ref    | 0.99 (0.64-1.54) | 0.75 (0.43-1.32) | 0.52 (0.21-1.29) | 0.10   |
| <b>No history of stroke or MI</b>                                                                                                                                                                                                                                                                                                |        |                  |                  |                  |        |
| Person-years                                                                                                                                                                                                                                                                                                                     | 136281 | 148546           | 69226            | 77221            |        |
| No. of cases                                                                                                                                                                                                                                                                                                                     | 1821   | 1132             | 426              | 349              |        |
| Mortality rate (per 1000 person-years)                                                                                                                                                                                                                                                                                           | 13.4   | 7.6              | 6.2              | 4.5              |        |
| Age-adjusted HR (95%CI)                                                                                                                                                                                                                                                                                                          | Ref    | 0.82 (0.76-0.89) | 0.73 (0.65-0.81) | 0.80 (0.71-0.90) | <0.001 |
| Multivariable HR (95%CI)                                                                                                                                                                                                                                                                                                         | Ref    | 0.88 (0.81-0.95) | 0.77 (0.69-0.86) | 0.82 (0.73-0.93) | <0.001 |
| HR, hazard ratio; CI, confidence interval.                                                                                                                                                                                                                                                                                       |        |                  |                  |                  |        |
| Multivariable HR: adjusted for age, green tea consumption, history of hypertension, history of diabetes, body mass index, smoking status, alcohol consumption, hours of exercise, hours of walking, perceived mental stress, educational level, regular employment, and dietary intakes of vegetable, fish, fruits and soybeans. |        |                  |                  |                  |        |



**Supplemental Table V. Hazard ratios (95% confidence intervals) of CVD and cancer mortality according to coffee consumption**

|                                        | Coffee consumption |                  |                   |                  | P for trend |
|----------------------------------------|--------------------|------------------|-------------------|------------------|-------------|
|                                        | None               | 1-6 Cups/Week    | 1 Cup/d           | ≥2 Cups/d        |             |
| <b>History of stroke</b>               |                    |                  |                   |                  |             |
| Person-years                           | 2703               | 2072             | 535               | 538              |             |
| CVD mortality                          |                    |                  |                   |                  |             |
| No. of cases                           | 52                 | 42               | 3                 | 10               |             |
| Mortality rate (per 1000 person-years) | 19.2               | 20.3             | 5.6               | 18.6             |             |
| Age- and sex-adjusted HR (95%CI)       | Ref                | 1.15 (0.77-1.74) | 0.34 (0.11-1.08)  | 1.28 (0.65-2.54) | 0.97        |
| Multivariable HR (95%CI)               | Ref                | 1.36 (0.84-2.21) | 0.36 (0.10-1.23)  | 2.03 (0.90-4.59) | 0.40        |
| Cancer mortality                       |                    |                  |                   |                  |             |
| No. of cases                           | 12                 | 16               | 6                 | 2                |             |
| Mortality rate (per 1000 person-years) | 4.4                | 7.7              | 11.2              | 3.7              |             |
| Age- and sex-adjusted HR (95%CI)       | Ref                | 1.78 (0.84-3.80) | 2.68 (0.99-7.23)  | 0.99 (0.22-4.46) | 0.55        |
| Multivariable HR (95%CI)               | Ref                | 2.71 (1.00-7.36) | 3.72 (0.97-14.35) | 0.62 (0.07-5.54) | 0.87        |
| <b>History of MI</b>                   |                    |                  |                   |                  |             |
| Person-years                           | 5092               | 4864             | 2398              | 2427             |             |
| CVD mortality                          |                    |                  |                   |                  |             |
| No. of cases                           | 66                 | 49               | 21                | 15               |             |
| Mortality rate (per 1000 person-years) | 13.0               | 10.1             | 8.8               | 6.2              |             |
| Age- and sex-adjusted HR (95%CI)       | Ref                | 0.87 (0.60-1.27) | 0.88 (0.53-1.44)  | 0.64 (0.36-1.13) | 0.14        |
| Multivariable HR (95%CI)               | Ref                | 0.84 (0.55-1.28) | 0.81 (0.47-1.40)  | 0.58 (0.31-1.09) | 0.10        |
| Cancer mortality                       |                    |                  |                   |                  |             |
| No. of cases                           | 30                 | 26               | 14                | 16               |             |
| Mortality rate (per 1000 person-years) | 5.9                | 5.3              | 5.8               | 6.6              |             |
| Age- and sex-adjusted HR (95%CI)       | Ref                | 0.90 (0.53-1.53) | 1.13 (0.60-2.14)  | 1.21 (0.65-2.27) | 0.42        |
| Multivariable HR (95%CI)               | Ref                | 1.04 (0.58-1.87) | 0.98 (0.48-1.98)  | 1.06 (0.51-2.21) | 0.92        |

| <b>No history of stroke or MI</b>                                                                                                                                                                                                                                                                                                     |        |                  |                  |                  |        |
|---------------------------------------------------------------------------------------------------------------------------------------------------------------------------------------------------------------------------------------------------------------------------------------------------------------------------------------|--------|------------------|------------------|------------------|--------|
| Person-years                                                                                                                                                                                                                                                                                                                          | 215936 | 248431           | 104707           | 138212           |        |
| <b>CVD mortality</b>                                                                                                                                                                                                                                                                                                                  |        |                  |                  |                  |        |
| No. of cases                                                                                                                                                                                                                                                                                                                          | 1145   | 731              | 273              | 268              |        |
| Mortality rate (per 1000 person-years)                                                                                                                                                                                                                                                                                                | 5.3    | 2.9              | 2.6              | 1.9              |        |
| Age- and sex-adjusted HR (95%CI)                                                                                                                                                                                                                                                                                                      | Ref    | 0.73 (0.67-0.81) | 0.76 (0.66-0.86) | 0.80 (0.70-0.92) | <0.001 |
| Multivariable HR (95%CI)                                                                                                                                                                                                                                                                                                              | Ref    | 0.79 (0.72-0.87) | 0.81 (0.71-0.93) | 0.81 (0.71-0.94) | 0.004  |
| <b>Cancer mortality</b>                                                                                                                                                                                                                                                                                                               |        |                  |                  |                  |        |
| No. of cases                                                                                                                                                                                                                                                                                                                          | 1191   | 1106             | 437              | 470              |        |
| Mortality rate (per 1000 person-years)                                                                                                                                                                                                                                                                                                | 5.5    | 4.5              | 4.2              | 3.4              |        |
| Age- and sex-adjusted HR (95%CI)                                                                                                                                                                                                                                                                                                      | Ref    | 0.94 (0.86-1.02) | 1.01 (0.90-1.13) | 0.96 (0.86-1.07) | 0.77   |
| Multivariable HR (95%CI)                                                                                                                                                                                                                                                                                                              | Ref    | 0.95 (0.88-1.03) | 1.00 (0.90-1.12) | 0.89 (0.80-1.00) | 0.11   |
| HR, hazard ratio; CI, confidence interval.                                                                                                                                                                                                                                                                                            |        |                  |                  |                  |        |
| Multivariable HR: adjusted for age, sex, green tea consumption, history of hypertension, history of diabetes, body mass index, smoking status, alcohol consumption, hours of exercise, hours of walking, perceived mental stress, educational level, regular employment, and dietary intakes of vegetable, fish, fruits and soybeans. |        |                  |                  |                  |        |

**Supplemental Table VI. Sensitivity analyses of all-cause mortality according to coffee consumption, excluding all participants who died during the first five years of follow-up**

|                                        | Coffee consumption |                  |                  |                  | P for trend |
|----------------------------------------|--------------------|------------------|------------------|------------------|-------------|
|                                        | None               | 1-6 Cups/Week    | 1 Cup/d          | ≥2 Cups/d        |             |
| <b>History of stroke</b>               |                    |                  |                  |                  |             |
| Person-years                           | 2629               | 2031             | 528              | 517              |             |
| No. of cases                           | 84                 | 65               | 12               | 14               |             |
| Mortality rate (per 1000 person-years) | 32.0               | 32.0             | 22.7             | 27.1             |             |
| Age- and sex-adjusted HR (95% CI)      | Ref                | 1.11 (0.80-1.54) | 0.87 (0.47-1.61) | 1.23 (0.69-2.18) | 0.66        |
| Multivariable HR (95% CI)              | Ref                | 1.76 (1.18-2.61) | 0.92 (0.45-1.86) | 1.76 (0.89-3.46) | 0.24        |
| <b>History of MI</b>                   |                    |                  |                  |                  |             |
| Person-years                           | 4978               | 4823             | 2348             | 2387             |             |
| No. of cases                           | 121                | 88               | 34               | 26               |             |
| Mortality rate (per 1000 person-years) | 24.3               | 18.2             | 14.5             | 10.9             |             |
| Age- and sex-adjusted HR (95% CI)      | Ref                | 0.84 (0.64-1.11) | 0.85 (0.58-1.25) | 0.67 (0.43-1.04) | 0.09        |
| Multivariable HR (95% CI)              | Ref                | 0.73 (0.53-0.99) | 0.73 (0.48-1.10) | 0.56 (0.35-0.91) | 0.02        |
| <b>No history of stroke or MI</b>      |                    |                  |                  |                  |             |
| Person-years                           | 214332             | 247338           | 104195           | 137677           |             |
| No. of cases                           | 3166               | 2458             | 861              | 885              |             |
| Mortality rate (per 1000 person-years) | 14.8               | 9.9              | 8.3              | 6.4              |             |
| Age- and sex-adjusted HR (95% CI)      | Ref                | 0.84 (0.79-0.88) | 0.84 (0.77-0.90) | 0.84 (0.78-0.91) | <0.001      |
| Multivariable HR (95% CI)              | Ref                | 0.87 (0.83-0.92) | 0.87 (0.80-0.93) | 0.82 (0.76-0.89) | <0.001      |

HR, hazard ratio; CI, confidence interval.

Multivariable HR: adjusted for age, sex, green tea consumption, history of hypertension, history of diabetes, body mass index, smoking status, alcohol consumption, hours of exercise, hours of walking, perceived mental stress, educational level, regular employment, and dietary intakes of vegetable, fish, fruits and soybeans.

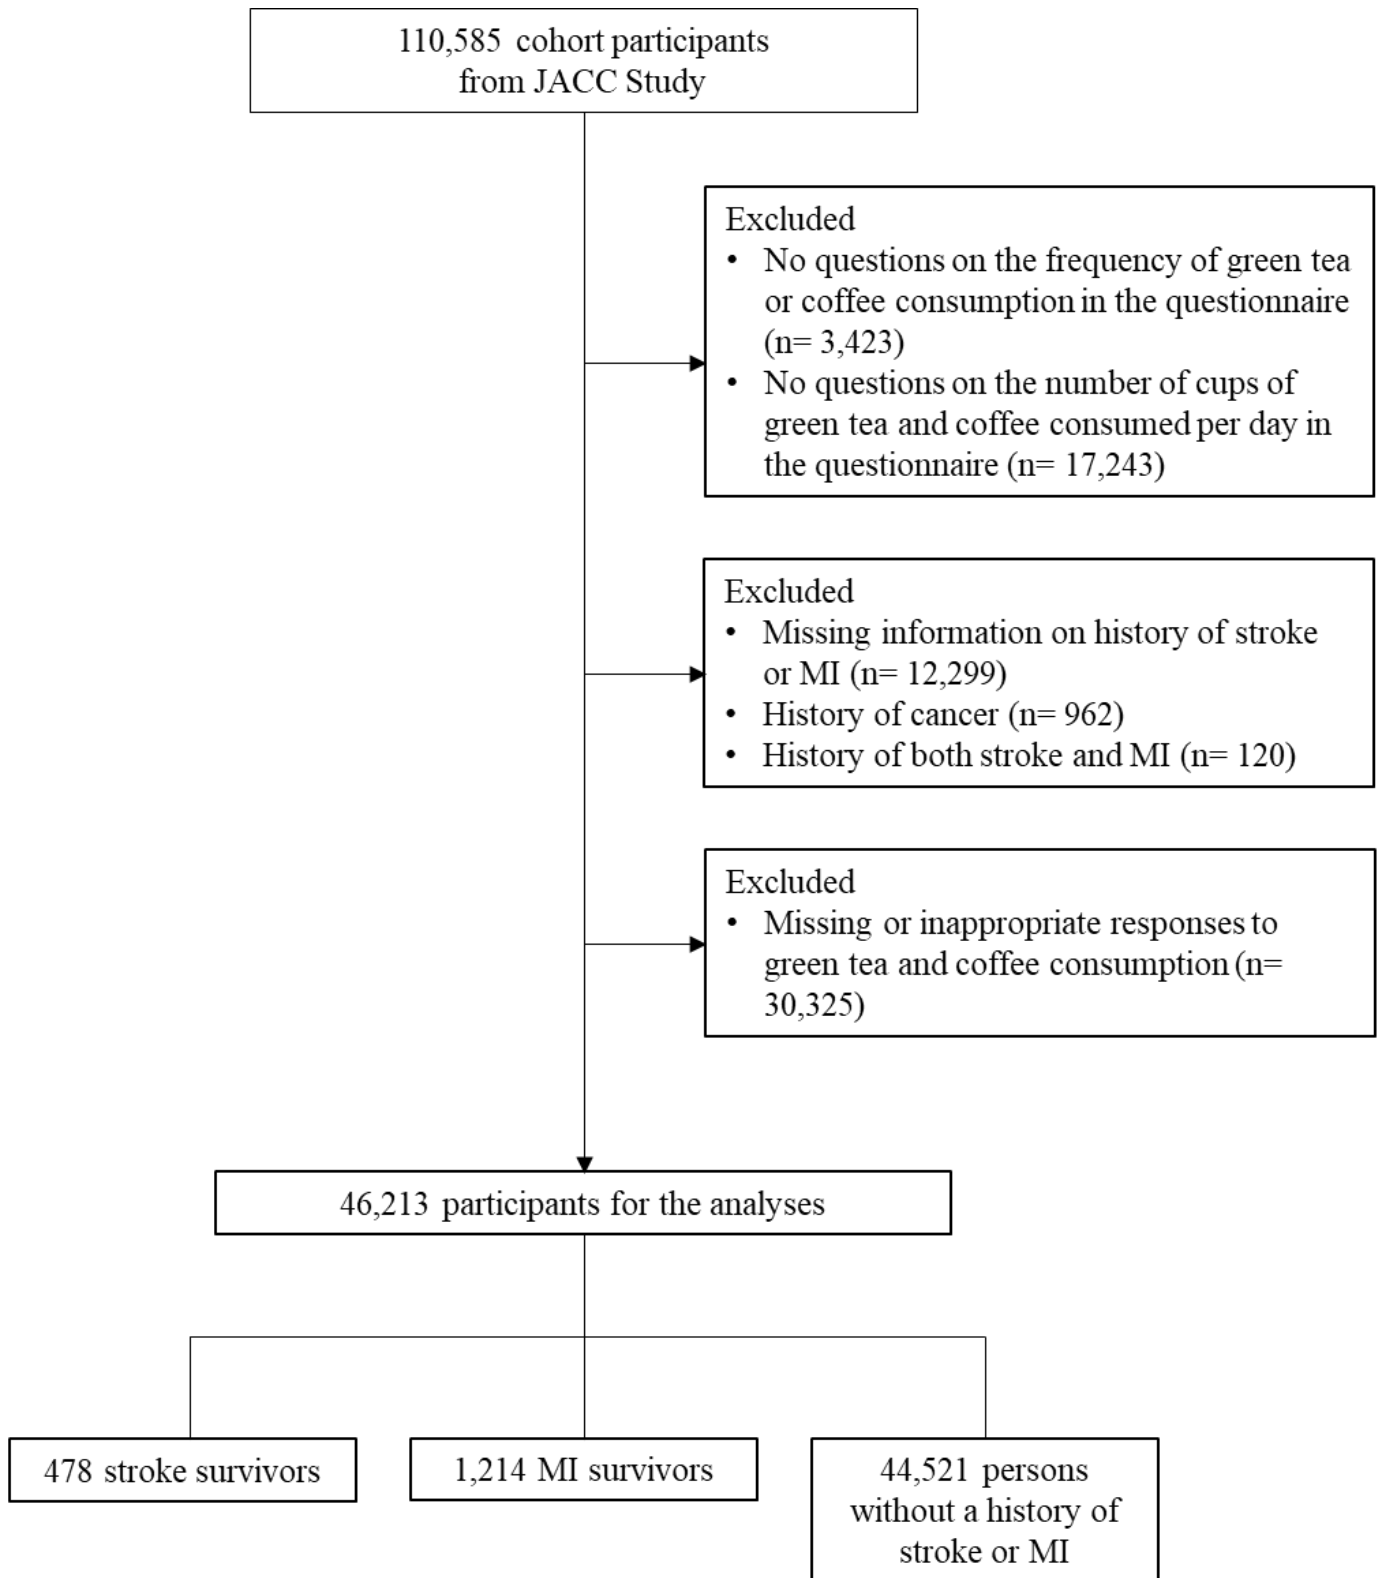

**Supplemental Figure I. Flow chart of study population selection**

JACC Study = Japan Collaborative Cohort Study for Evaluation of Cancer Risk  
 MI = myocardial infarction
